# Supplementary material for: Transition from AFM Spin Canting to Spin Glass–AFM Exchange as Particle Size Decreases in LaFeO3
Source: MDPI journal article supplement (doi:10.3390/nano13101657), 2023-05-17
Supplement: s1 [file s1]

# Transition from AFM Spin Canting to Spin Glass–AFM Exchange as Particle Size Decreases in LaFeO<sub>3</sub>

## S1. Compositional analysis

Table S1: XEDS analyses in LF-800 sample.

| Fe<br>Atomic (%) | La<br>Atomic (%) | Stoichiometric<br>Composition                        |
|------------------|------------------|------------------------------------------------------|
| 42.68            | 57.32            | La <sub>1.15</sub> Fe <sub>0.85</sub> O <sub>3</sub> |
| 45.98            | 54.02            | La <sub>1.08</sub> Fe <sub>0.92</sub> O <sub>3</sub> |
| 45.04            | 54.96            | La <sub>1.10</sub> Fe <sub>0.90</sub> O <sub>3</sub> |
| 44.78            | 55.22            | La <sub>1.10</sub> Fe <sub>0.90</sub> O <sub>3</sub> |

---

|       |       |                                                                |
|-------|-------|----------------------------------------------------------------|
| 48.12 | 51.88 | $\text{La}_{1.04}\text{Fe}_{0.96}\text{O}_3$                   |
| 43.98 | 56.02 | $\text{La}_{1.12}\text{Fe}_{0.88}\text{O}_3$                   |
| 45.10 | 54.90 | $\text{La}_{1.10}\text{Fe}_{0.90}\text{O}_3$                   |
| 45.21 | 54.79 | $\text{La}_{1.10}\text{Fe}_{0.90}\text{O}_3$                   |
| 44.55 | 55.45 | $\text{La}_{1.11}\text{Fe}_{0.89}\text{O}_3$                   |
| 44.87 | 55.13 | $\text{La}_{1.10}\text{Fe}_{0.90}\text{O}_3$                   |
| 45.11 | 54.89 | $\text{La}_{1.10}\text{Fe}_{0.90}\text{O}_3$                   |
| 46.25 | 53.75 | $\text{La}_{1.08}\text{Fe}_{0.92}\text{O}_3$                   |
| 47.09 | 52.91 | $\text{La}_{1.06}\text{Fe}_{0.94}\text{O}_3$                   |
| 45.51 | 54.49 | $\text{La}_{1.09}\text{Fe}_{0.91}\text{O}_3$                   |
| 49.52 | 50.48 | $\text{La}_{1.01}\text{Fe}_{0.99}\text{O}_3$                   |
| 44.80 | 55.20 | $\text{La}_{1.10}\text{Fe}_{0.90}\text{O}_3$                   |
| 46.36 | 53.64 | $\text{La}_{1.07}\text{Fe}_{0.93}\text{O}_3$                   |
| 45.84 | 54.16 | $\text{La}_{1.08}\text{Fe}_{0.92}\text{O}_3$                   |
| 45.58 | 54.42 | $\text{La}_{1.09}\text{Fe}_{0.91}\text{O}_3$                   |
| 43.97 | 56.03 | $\text{La}_{1.12}\text{Fe}_{0.88}\text{O}_3$                   |
| 47.48 | 52.52 | $\text{La}_{1.05}\text{Fe}_{0.95}\text{O}_3$                   |
| 44.25 | 55.75 | $\text{La}_{1.12}\text{Fe}_{0.88}\text{O}_3$                   |
| 48.26 | 51.74 | $\text{La}_{1.04}\text{Fe}_{0.96}\text{O}_3$                   |
| 43.51 | 56.49 | $\text{La}_{1.13}\text{Fe}_{0.87}\text{O}_3$                   |
|       |       | <b><math>\text{La}_{1.09}\text{Fe}_{0.91}\text{O}_3</math></b> |

## S2. XRD Diffraction

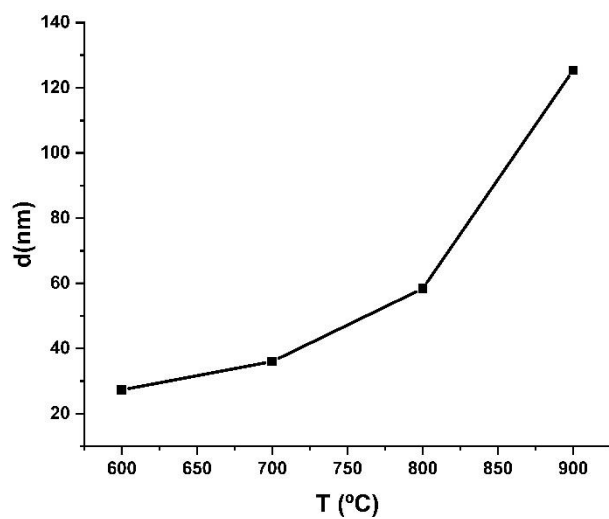

**Figure S1:** Mean crystallite size (nm) calculated by Scherrer's equation for all sol-gel samples LF-600, LF-700, LF-800, and LF-900.

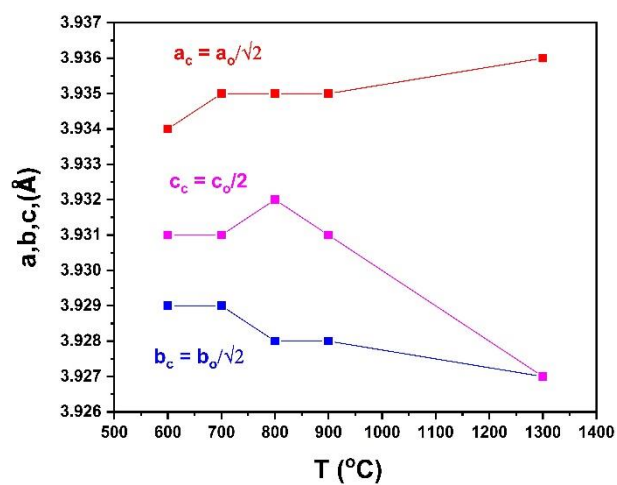

**Figure S2:** The variation values of cell parameters a, b, and c as a function of annealing temperature.

### S3. High resolution microscopy.

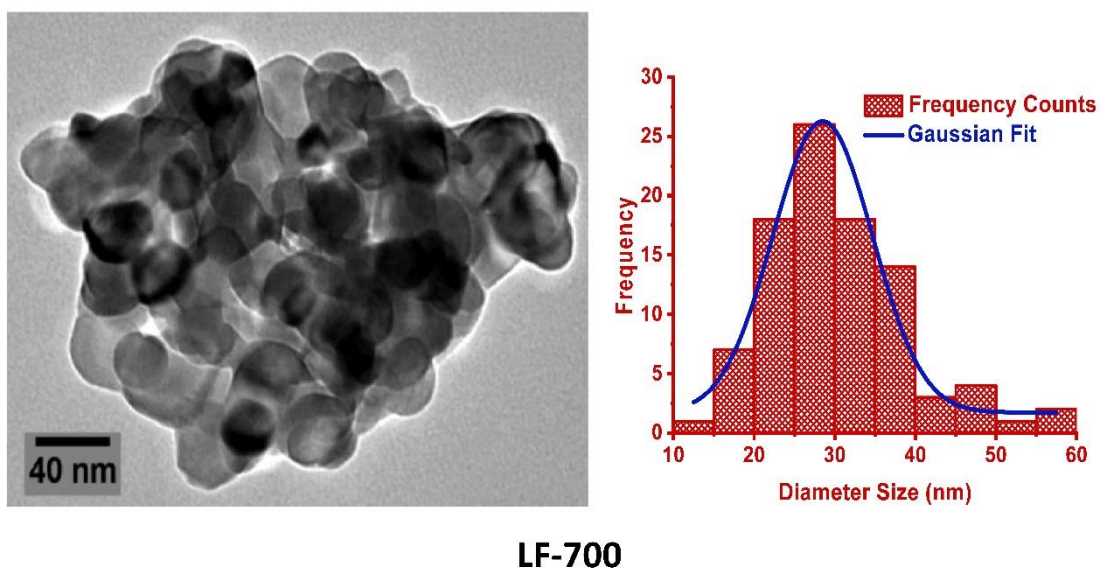

**Figure S3:** (Left) LF-700 TEM image. (Right) Distribution of the nanoparticle diameters with Gaussian fit.

#### S4. Magnetic properties

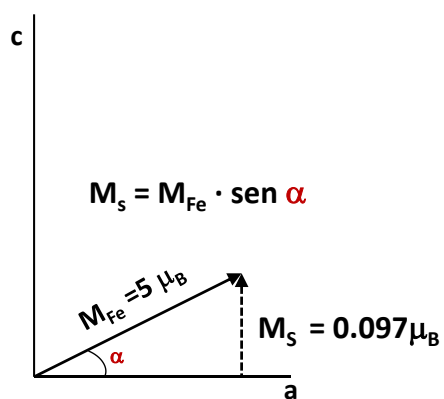

**Figure S4:** Spin canting angle.
